# Supplementary material
Source: publisher figshare collection journal article supplement (https://springernature.figshare.com/ndownloader/files/14330807)
Supplement: Supplementary file [file 14330807]

### Additional file 3. Summary of findings

## Secondary alveolar bone grafting in patients with cleft lip and palate

**Patient or population:** Secondary alveolar bone graft

**Setting:**

**Intervention:** rhBMP2

**Comparison:** Iliac crest

| Outcomes                         | Anticipated absolute effects* (95% CI)                 |                                                                                                 | Relative effect (95% CI) | N° of participants (studies) | Certainty of the evidence (GRADE) | Comments |
|----------------------------------|--------------------------------------------------------|-------------------------------------------------------------------------------------------------|--------------------------|------------------------------|-----------------------------------|----------|
|                                  | Risk with Iliac crest                                  | Risk with BMP-2                                                                                 |                          |                              |                                   |          |
| Bone volume follow up: 6 months  | The mean bone volume ranged from <b>48-76</b> %        | The mean bone volume in the intervention group was 14,41 % fewer (22,39 fewer to 6,42 fewer)    | -                        | 35 (3 RCTs)                  | ⊕⊕⊕○<br>MODERATE <sup>a</sup>     |          |
| Bone volume follow up: 12 months | The mean bone volume ranged from <b>66-80</b> %        | The mean bone volume in the intervention group was 6,22 % more (15,96 fewer to 28,42 more)      | -                        | 49 (3 RCTs)                  | ⊕⊕⊕○<br>MODERATE <sup>a</sup>     |          |
| Bone height follow up: 6 months  | The mean bone height ranged from <b>64-83</b> %        | The mean bone height in the intervention group was 18,73 % fewer (43,56 fewer to 6,08 more)     | -                        | 28 (2 RCTs)                  | ⊕⊕⊕○<br>MODERATE <sup>a</sup>     |          |
| Bone height follow up: 12 months | The mean bone height ranged from <b>64-86</b> %        | The mean bone height in the intervention group was 4,4 % fewer (30,63 fewer to 21,83 more)      | -                        | 49 (3 RCTs)                  | ⊕⊕⊕○<br>MODERATE <sup>a</sup>     |          |
| Hospital stay                    | The mean hospital stay ranged from <b>1.8-3.3</b> days | The mean hospital stay in the intervention group was 1,14 days fewer (2,14 fewer to 0,14 fewer) | -                        | 26 (2 RCTs)                  | ⊕⊕⊕○<br>MODERATE <sup>a</sup>     |          |

\***The risk in the intervention group** (and its 95% confidence interval) is based on the assumed risk in the comparison on group and the **relative effect** of the intervention (and its 95% CI).

**CI:** Confidence interval; **MD:** Mean difference

**GRADE Working Group grades of evidence**

**High certainty:** We are very confident that the true effect lies close to that of the estimate of the effect

**Moderate certainty:** We are moderately confident in the effect estimate: The true effect is likely to be close to the estimate of the effect, but there is a possibility that it is substantially different

**Low certainty:** Our confidence in the effect estimate is limited: The true effect may be substantially different from the estimate of the effect

**Very low certainty:** We have very little confidence in the effect estimate: The true effect is likely to be substantially different from the estimate of effect

**Explanations**

**a.** All the studies are assessed as being at high risk of bias . Random sequence generation: All the studies mentioned random allocation but none mentioned the detail of sequence generation. Thus the sequence generation was not clear. Allocation concealment: None of the included studies had clearly described the allocation concealment. Blinding of participants and personnel: None of the studies mentioned whether the surgeon or participants were blinded, so blinding was also considered to be unknown. Blinding of outcome assessment: None of the studies mentioned blinding of outcome assessors Incomplete outcome data: From all the studies, there were no reported dropouts. Selective reporting: In Dickinson 2008 some of the variables mentioned in "materials and methods" was not fully reported in "results ". Other bias: We did not find any other source of bias.
